# Supplementary material for: Production, use, and fate of all plastics ever made
Source: PubMed Central journal article supplement — Sci Adv. 2017 Jul 19;3(7):e1700782. doi: 10.1126/sciadv.1700782 (PMC5517107; doi:10.1126/sciadv.1700782), 2017-07-19
Supplement: 1700782_SM.pdf [file 1700782_SM.pdf]

## Supplementary Materials for **Production, use, and fate of all plastics ever made**

Roland Geyer, Jenna R. Jambeck, Kara Lavender Law

Published 19 July 2017, *Sci. Adv.* **3**, e1700782 (2017)

DOI: 10.1126/sciadv.1700782

### **This PDF file includes:**

- fig. S1. Global primary plastics production (in million metric tons) according to industrial use sector from 1950 to 2015.
- fig. S2. Global primary plastics production (in million metric tons) according to polymer type from 1950 to 2015.
- fig. S3. Global primary plastics waste generation (in million metric tons) according to industrial use sector from 1950 to 2015.
- fig. S4. Global primary plastics waste generation (in million metric tons) according to polymer type from 1950 to 2015.
- fig. S5. Estimated percentage of global (nonfiber) plastic waste recycled, incinerated, and discarded from 1950 to 2014 [(12, 13, 34–42) and table S7].
- fig. S6. Annual global primary and secondary plastic waste generation TW ( $t$ ), recycling RW ( $t$ ), incineration IW ( $t$ ), and discard DW ( $t$ ) (in million metric tons) from 1950 to 2014.
- fig. S7. Projection of global trends in recycling, incineration, and discard of plastic waste from 1980 to 2014 (to the left of vertical black line) to 2050 (to the right of vertical black line).
- table S1. Annual global polymer resin and fiber production in million metric tons (12–15).
- table S2. Share of total polymer resin production according to polymer type and industrial use sector calculated from data for Europe, the United States, China, and India covering the period 2002–2014 (12, 13, 19–24).
- table S3. Share of additive type in global plastics production from data covering the period 2000–2014 (17, 18).
- table S4. Baseline mean values and SDs used to generate log-normal product lifetime distributions for the eight industrial use sectors used in this study (22, 25–29).

- table S5. Global primary plastics production and primary waste generation (in million metric tons) in 2015 according to industrial use sector.
- table S6. Global primary plastics production and primary waste generation (in million metric tons) in 2015 according to polymer type/additive.
- table S7. Additional data sources for U.S. plastics recycling and incineration.
- table S8. Complete list of data sources.

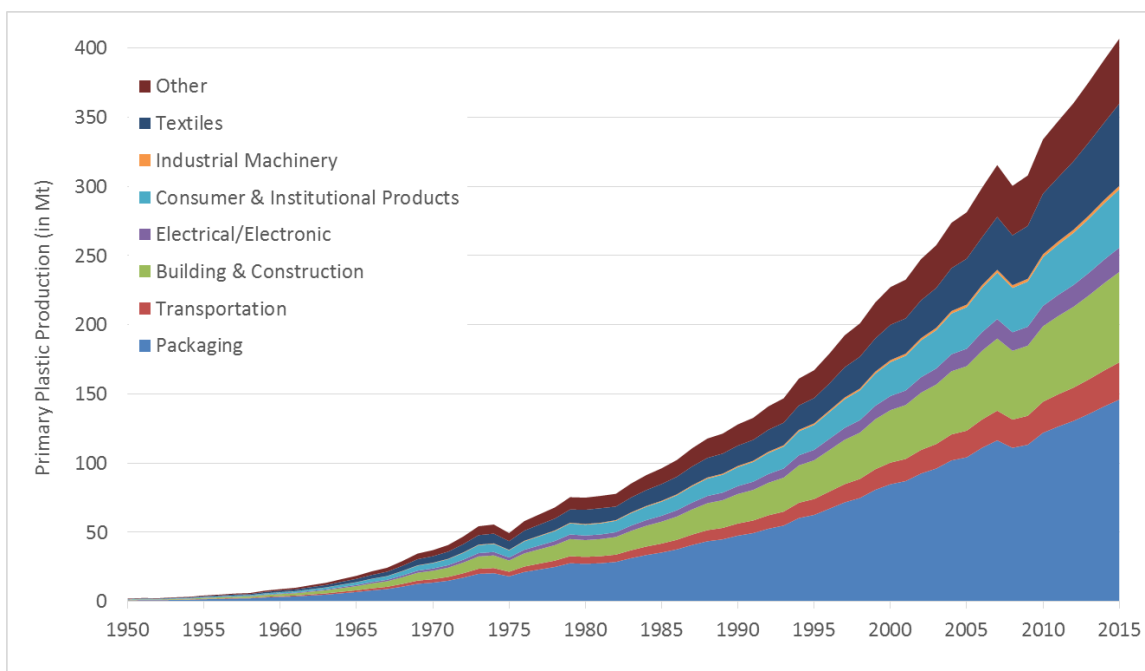

**fig. S1. Global primary plastics production (in million metric tons) according to industrial use sector from 1950 to 2015.**

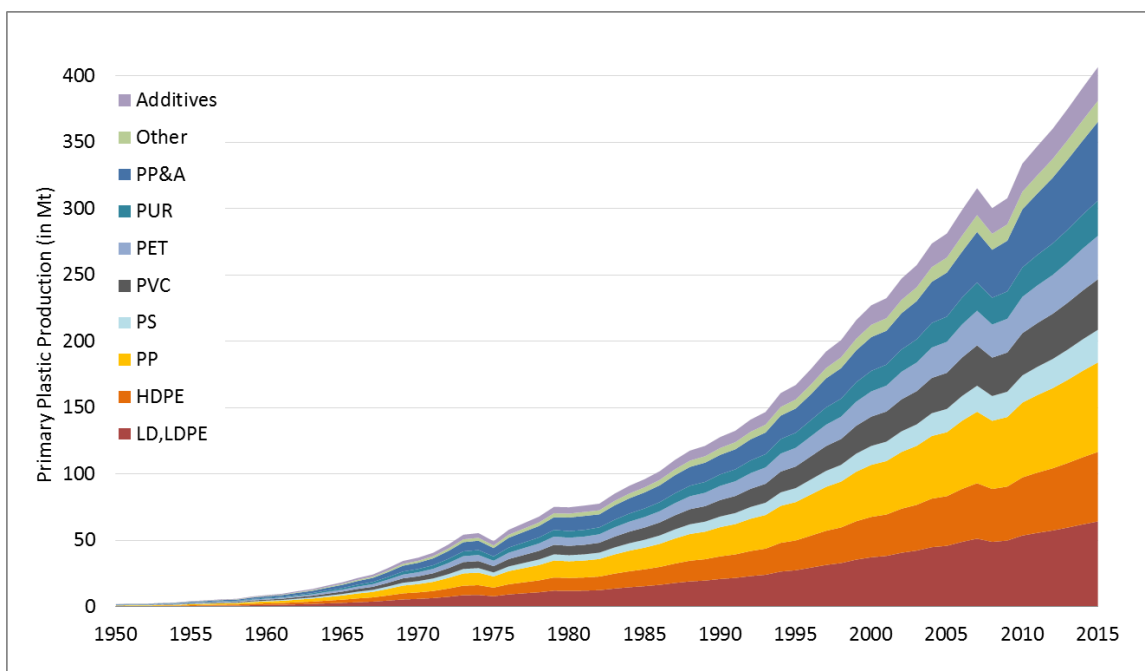

**fig. S2. Global primary plastics production (in million metric tons) according to polymer type from 1950 to 2015.**

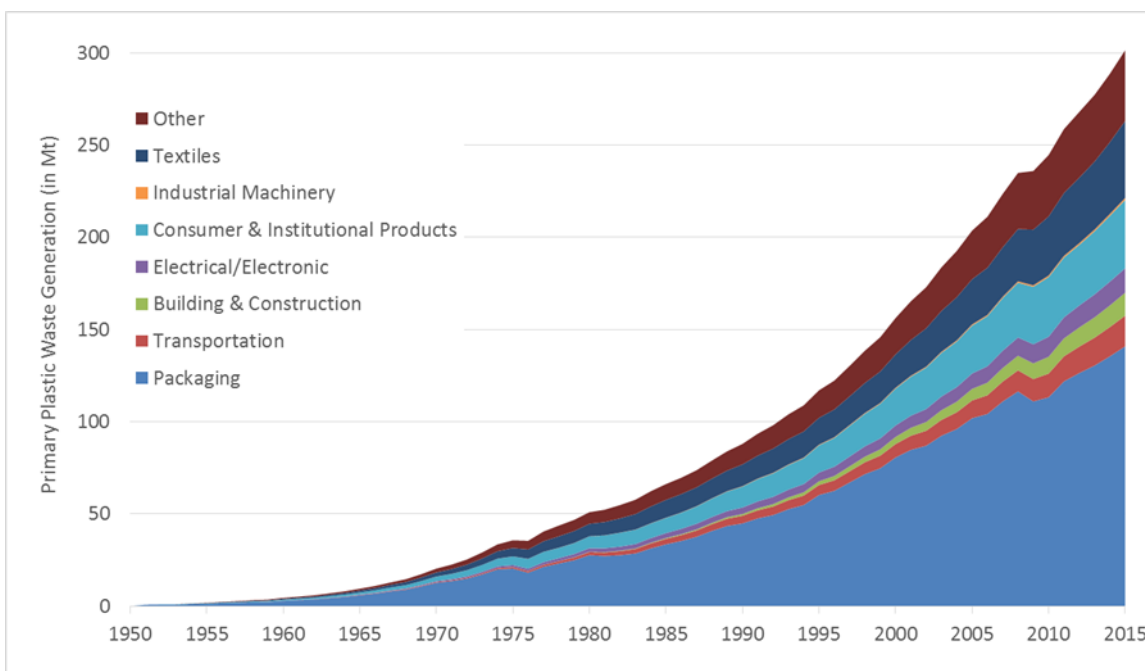

**fig. S3. Global primary plastics waste generation (in million metric tons) according to industrial use sector from 1950 to 2015.**

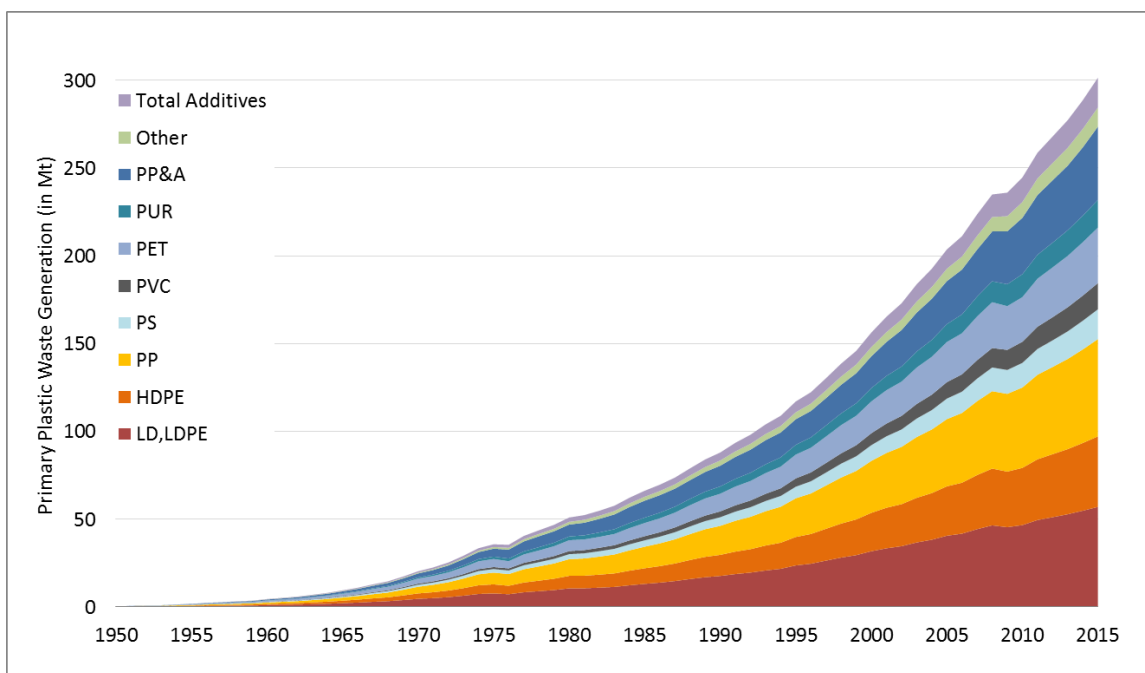

**fig. S4. Global primary plastics waste generation (in million metric tons) according to polymer type from 1950 to 2015.**

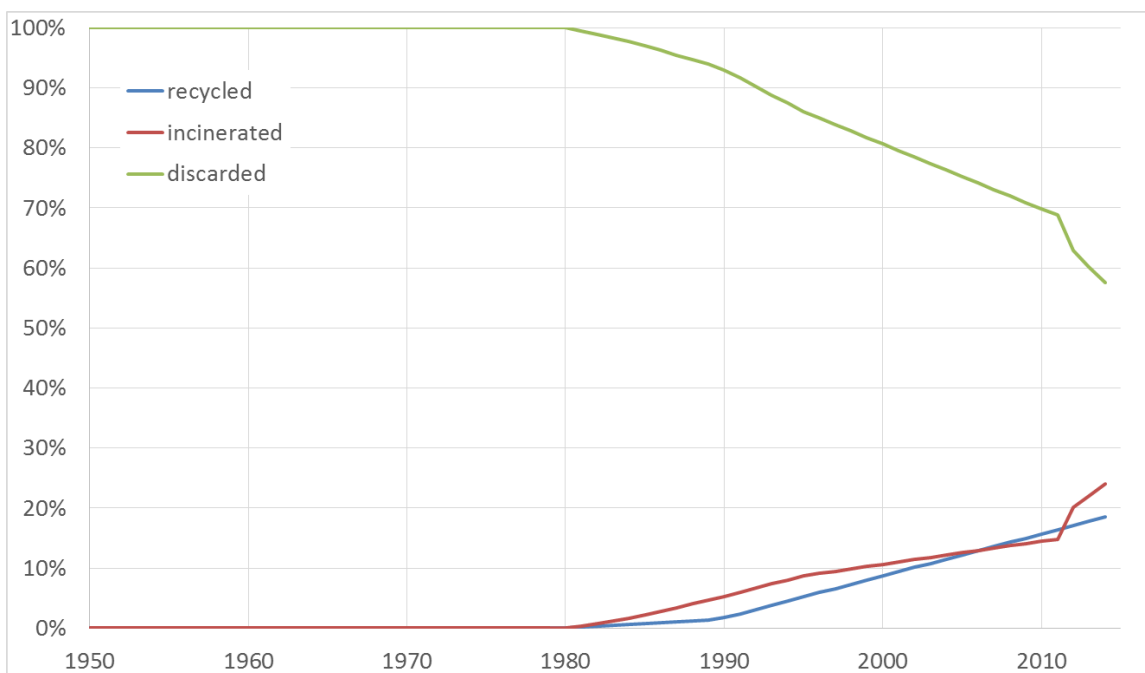

**fig. S5. Estimated percentage of global (nonfiber) plastic waste recycled, incinerated, and discarded from 1950 to 2014 [(12, 13, 34–42) and table S7].**

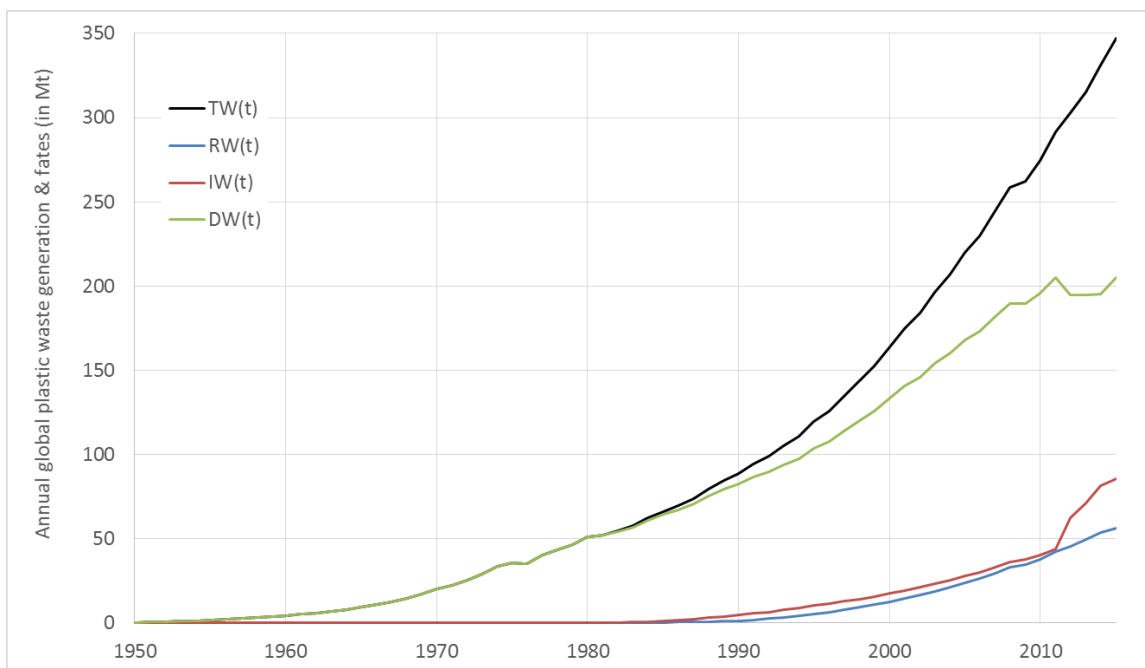

**fig. S6. Annual global primary and secondary plastic waste generation  $TW(t)$ , recycling  $RW(t)$ , incineration  $IW(t)$ , and discard  $DW(t)$  (in million metric tons) from 1950 to 2014.**

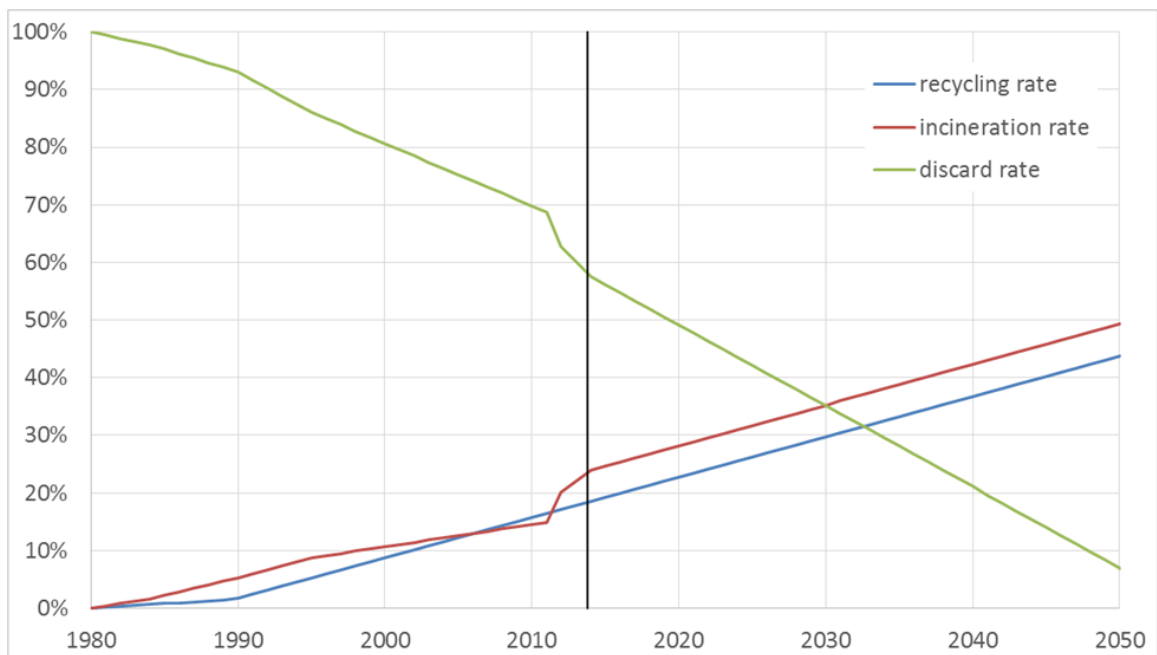

**fig. S7. Projection of global trends in recycling, incineration, and discard of plastic waste from 1980 to 2014 (to the left of vertical black line) to 2050 (to the right of vertical black line).**

**table S1. Annual global polymer resin and fiber production in million metric tons (12–15).**

| <b>Year</b> | <b>Global Production<br/>(Mt)</b> |
|-------------|-----------------------------------|
|             | <b>Resin</b>                      |
| 2015        | 381                               |
| 2014        | 367                               |
| 2013        | 352                               |
| 2012        | 338                               |
| 2011        | 325                               |
| 2010        | 313                               |
| 2009        | 288                               |
| 2008        | 281                               |
| 2007        | 295                               |
| 2006        | 280                               |
| 2005        | 263                               |
| 2004        | 256                               |
| 2003        | 241                               |
| 2002        | 231                               |
| 2001        | 218                               |
| 2000        | 213                               |
| 1999        | 202                               |
| 1998        | 188                               |
| 1997        | 180                               |
| 1996        | 168                               |
| 1995        | 156                               |
| 1994        | 151                               |
| 1993        | 137                               |
| 1992        | 132                               |
| 1991        | 124                               |
| 1990        | 120                               |
| 1989        | 114                               |
| 1988        | 110                               |
| 1987        | 104                               |
| 1986        | 96                                |
| 1985        | 90                                |
| 1984        | 86                                |
| 1983        | 80                                |
| 1982        | 73                                |
| 1981        | 72                                |
| 1980        | 70                                |
| 1979        | 71                                |
| 1978        | 64                                |
| 1977        | 59                                |
| 1976        | 54                                |
| 1975        | 46                                |

|      |    |
|------|----|
| 1974 | 52 |
| 1973 | 51 |
| 1972 | 44 |
| 1971 | 38 |
| 1970 | 35 |
| 1969 | 32 |
| 1968 | 27 |
| 1967 | 23 |
| 1966 | 20 |
| 1965 | 17 |
| 1964 | 15 |
| 1963 | 13 |
| 1962 | 11 |
| 1961 | 9  |
| 1960 | 8  |
| 1959 | 7  |
| 1958 | 6  |
| 1957 | 5  |
| 1956 | 5  |
| 1955 | 4  |
| 1954 | 3  |
| 1953 | 3  |
| 1952 | 2  |
| 1951 | 2  |
| 1950 | 2  |

**table S2. Share of total polymer resin production according to polymer type and industrial use sector calculated from data for Europe, the United States, China, and India covering the period 2002–2014 (12, 13, 19–24).** Note that PP&A fibers are assigned exclusively to the Textile sector. The above table is for non-fibers only.

| <b>Market Sector</b>              | <b>LDPE, LLDPE</b> | <b>HDPE</b> | <b>PP</b> | <b>PS</b> | <b>PVC</b> | <b>PET</b> | <b>PUR</b> | <b>Other</b> | <b>Total</b> |
|-----------------------------------|--------------------|-------------|-----------|-----------|------------|------------|------------|--------------|--------------|
| Transportation                    | 0.1%               | 0.8%        | 2.6%      | 0.0%      | 0.3%       | 0.0%       | 1.6%       | 1.4%         | 6.7%         |
| Packaging                         | 13.5%              | 9.3%        | 8.2%      | 2.3%      | 0.9%       | 10.1%      | 0.2%       | 0.1%         | 44.8%        |
| Building and Construction         | 1.1%               | 3.3%        | 1.2%      | 2.2%      | 8.1%       | 0.0%       | 2.4%       | 0.5%         | 18.8%        |
| Electrical /Electronic            | 0.5%               | 0.2%        | 0.9%      | 0.6%      | 0.4%       | 0.0%       | 0.4%       | 1.0%         | 3.8%         |
| Consumer & Institutional Products | 2.9%               | 1.7%        | 3.8%      | 1.8%      | 0.6%       | 0.0%       | 1.0%       | 0.2%         | 11.9%        |
| Industrial Machinery              | 0.2%               | 0.1%        | 0.2%      | 0.0%      | 0.0%       | 0.0%       | 0.3%       | 0.0%         | 0.8%         |
| Other                             | 1.7%               | 0.9%        | 4.2%      | 0.7%      | 1.4%       | 0.0%       | 2.5%       | 1.7%         | 13.2%        |
| Total                             | 20.0%              | 16.3%       | 21.0%     | 7.6%      | 11.8%      | 10.2%      | 8.2%       | 4.9%         | 100.0%       |

**table S3. Share of additive type in global plastics production from data covering the period 2000–2014 (17, 18).**

| <b>Additive type</b> | <b>Percentage</b> |
|----------------------|-------------------|
| Plasticizers         | 34%               |
| Flame retardants     | 13%               |
| Heat stabilizers     | 5%                |
| Fillers              | 28%               |
| Impact modifiers     | 5%                |
| Antioxidants         | 6%                |
| Colorants            | 2%                |
| Lubricants           | 2%                |
| Light stabilizers    | 1%                |
| Other                | 4%                |

**table S4. Baseline mean values and SDs used to generate log-normal product lifetime distributions for the eight industrial use sectors used in this study (22, 25–29).**

| <b>Market Sector</b>              | <b>Mean (in years)</b> | <b>Standard deviation</b> |
|-----------------------------------|------------------------|---------------------------|
| Packaging                         | 0.5                    | 0.1                       |
| Transportation                    | 13                     | 3                         |
| Building and Construction         | 35                     | 7                         |
| Electrical/ Electronic            | 8                      | 2                         |
| Consumer & Institutional Products | 3                      | 1                         |
| Industrial Machinery              | 20                     | 3                         |
| Other                             | 5                      | 1.5                       |
| Textiles                          | 5                      | 1.5                       |

**table S5. Global primary plastics production and primary waste generation (in million metric tons) in 2015 according to industrial use sector.**

| <b>Market Sector</b>              | <b>2015 Primary Production (Mt)</b> | <b>2015 Primary Waste Generation (Mt)</b> |
|-----------------------------------|-------------------------------------|-------------------------------------------|
| Packaging                         | 146                                 | 141                                       |
| Transportation                    | 27                                  | 17                                        |
| Building and Construction         | 65                                  | 13                                        |
| Electrical/ Electronic            | 18                                  | 13                                        |
| Consumer & Institutional Products | 42                                  | 37                                        |
| Industrial Machinery              | 3                                   | 1                                         |
| Textiles                          | 59                                  | 42                                        |
| Other                             | 47                                  | 38                                        |
| <b>Total</b>                      | <b>407</b>                          | <b>302</b>                                |

**table S6. Global primary plastics production and primary waste generation (in million metric tons) in 2015 according to polymer type/additive.**

| <b>Polymer type/additive</b> | <b>2015 Primary Production (Mt)</b> | <b>2015 Primary Waste Generation (Mt)</b> |
|------------------------------|-------------------------------------|-------------------------------------------|
| LD, LDPE                     | 64                                  | 57                                        |
| HDPE                         | 52                                  | 40                                        |
| PP                           | 68                                  | 55                                        |
| PS                           | 25                                  | 17                                        |
| PVC                          | 38                                  | 15                                        |
| PET                          | 33                                  | 32                                        |
| PUR                          | 27                                  | 16                                        |
| PP&A fibers                  | 59                                  | 42                                        |
| Other                        | 16                                  | 11                                        |
| Additives                    | 25                                  | 17                                        |
| <b>Total</b>                 | <b>407</b>                          | <b>302</b>                                |

**table S7. Additional data sources for U.S. plastics recycling and incineration.**

|                                                                                          |
|------------------------------------------------------------------------------------------|
| U.S. EPA. Characterization of Municipal Solid Waste in the United States:                |
| 1995 Update. EPA/530-R-945-001. March 1996                                               |
| 1996 Update. EPA/530-R-97-015. June 1997.                                                |
| 1997 Update. EPA/530-R-98-007. May 1998.                                                 |
| 1998 Update. EPA/530-R-99-021. September 1999.                                           |
| U.S. EPA. Municipal Solid Waste Generation, Recycling and Disposal in the United States: |
| Facts and Figures for 1998. EPA/530-F-00-024. April 2000.                                |
| 1999 Facts and Figures. EPA/530-R-01-014. July 2001                                      |
| 2000 Facts and Figures. EPA/530-R-02-001. June 2002.                                     |
| 2001 Facts and Figures. EPA/530-R-03-011. October 2003.                                  |
| 2005 Facts and Figures. EPA530-R-06-011. October 2006.                                   |
| 2007 Facts and Figures. EPA530-R-08-010. November 2008.                                  |
| 2009 Facts and Figures. December 2010. EPA530-R-10-012.                                  |
| Facts and Figures for 2012, February 2014. EPA-530-F-14-001.                             |
| U.S. EPA. Advancing Sustainable Materials Management:                                    |
| 2013 Fact Sheet, June 2015. EPA530-R-15-003.                                             |
| 2014 Fact Sheet, November 2016. EPA530-R-17-01.                                          |

**table S8. Complete list of data sources.**

| <b>Data</b>                            | <b>Reference</b>       |
|----------------------------------------|------------------------|
| Global resin production                | (12, 13)               |
| Global fiber production                | (14, 15)               |
| Global additives production            | (17, 18)               |
| Sector and polymer shares of resin     | (12, 13, 19–24)        |
| Sector and polymer shares of additives | (17, 18)               |
| Product lifetime data                  | (22, 25–29)            |
| European waste management data         | (12, 13, 38)           |
| U.S. waste management data             | (34, 42, and table S7) |
| Chinese waste management data          | (35, 36, 39, 40)       |
| Rest of world waste management data    | (37)                   |
